# Supplementary material
Source: Springer Nature journal article supplement (https://www.springermedizin.de/resource/supplementary/12913_2013_3504_MOESM3_ESM.pdf/9533040)
Supplement: MOESM3 [file 9533040]

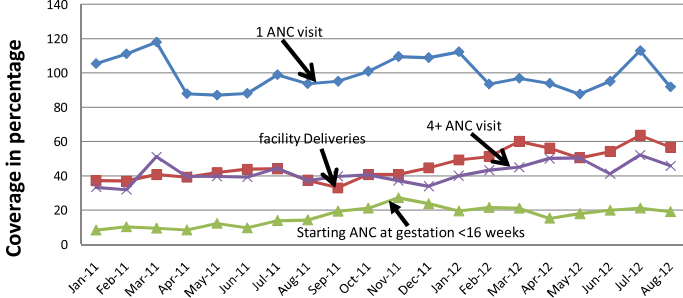

|                                                           | Jan-11 | Feb-11 | Mar-11 | Apr-11 | May-11 | Jun-11 | Jul-11 | Aug-11 | Sep-11 | Oct-11 | Nov-11 | Dec-11 | Jan-12 | Feb-12 | Mar-12 | Apr-12 | May-12 | Jun-12 | Jul-12 | Aug-12 |
|-----------------------------------------------------------|--------|--------|--------|--------|--------|--------|--------|--------|--------|--------|--------|--------|--------|--------|--------|--------|--------|--------|--------|--------|
| % pregnant women making >= 1 ANC visit                    | 106    | 111    | 118    | 88     | 87     | 88     | 99     | 94     | 95     | 101    | 110    | 109    | 112    | 94     | 97     | 94     | 88     | 95     | 113    | 92     |
| % pregnant women completing 4+ ANC visits                 | 37     | 37     | 41     | 39     | 42     | 44     | 44     | 37     | 33     | 41     | 41     | 45     | 49     | 51     | 60     | 56     | 51     | 54     | 64     | 57     |
| % pregnant women registered w/ 1st ANC visit at <16 weeks | 8      | 10     | 9      | 8      | 12     | 10     | 14     | 14     | 19     | 21     | 27     | 24     | 20     | 22     | 21     | 15     | 18     | 20     | 21     | 19     |
| % health facility deliveries                              | 33     | 32     | 51     | 40     | 40     | 39     | 44     | 37     | 40     | 41     | 37     | 34     | 40     | 43     | 45     | 50     | 50     | 41     | 52     | 46     |

\*\* The higher than 100% ANC first visit may reflect population dynamics (in and out migrations) from the district.
